# Supplementary material for: Combination of preoperative neutrophil-lymphocyte ratio, platelet-lymphocyte ratio and monocyte-lymphocyte ratio: a superior prognostic factor of endometrial cancer
Source: Springer Nature journal article supplement (doi:10.1186/s12885-020-06953-8), 2020-05-24

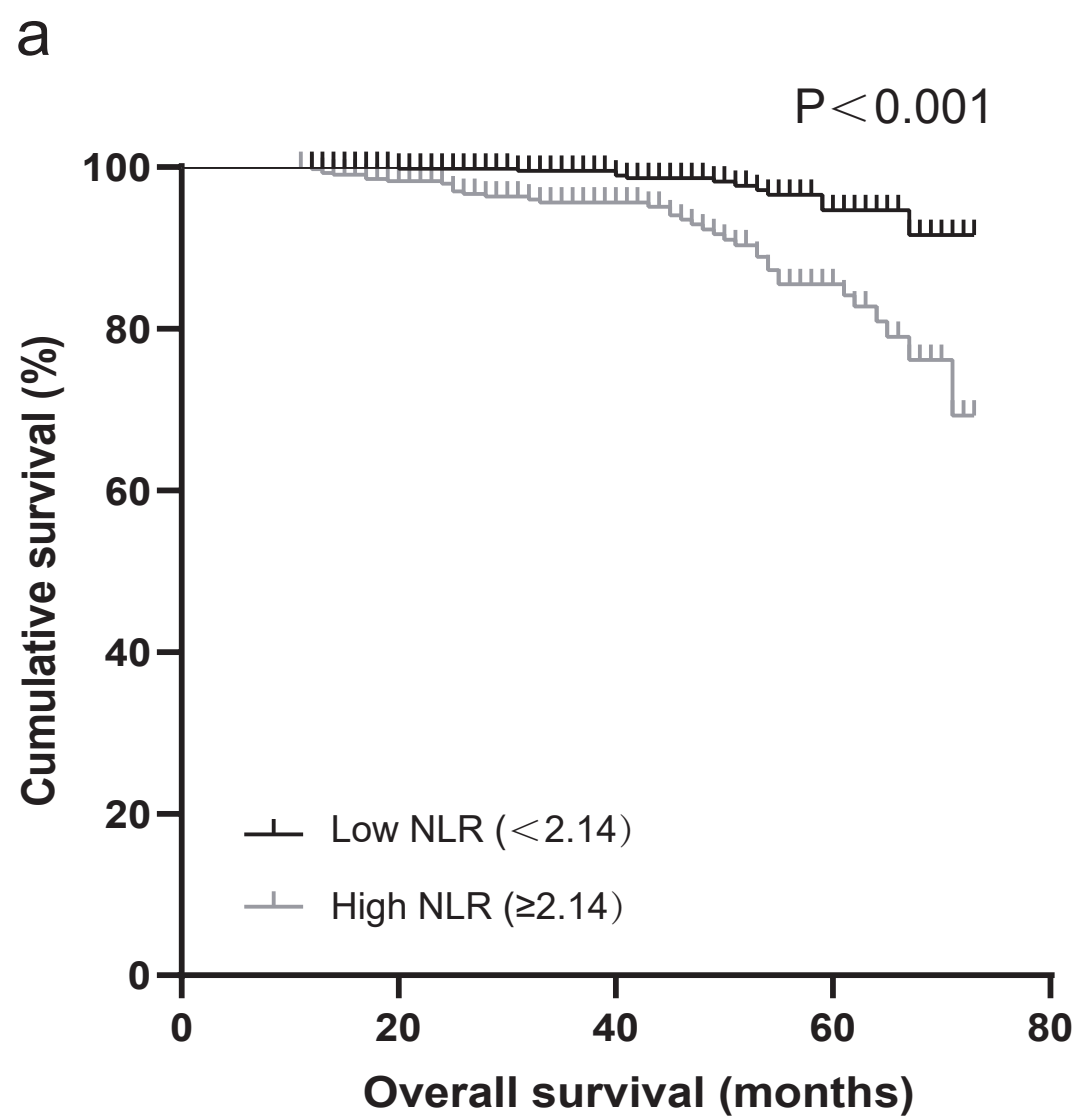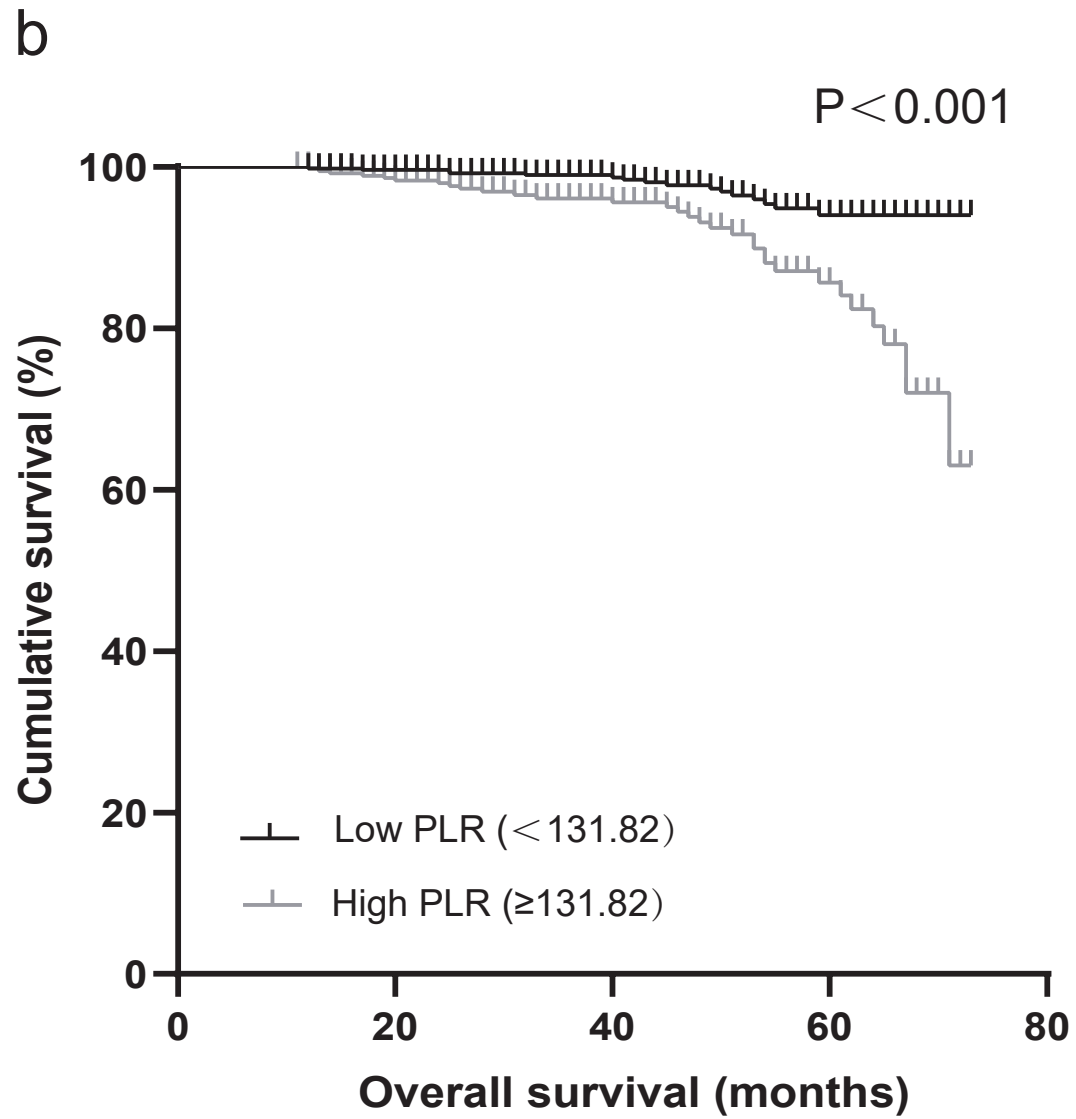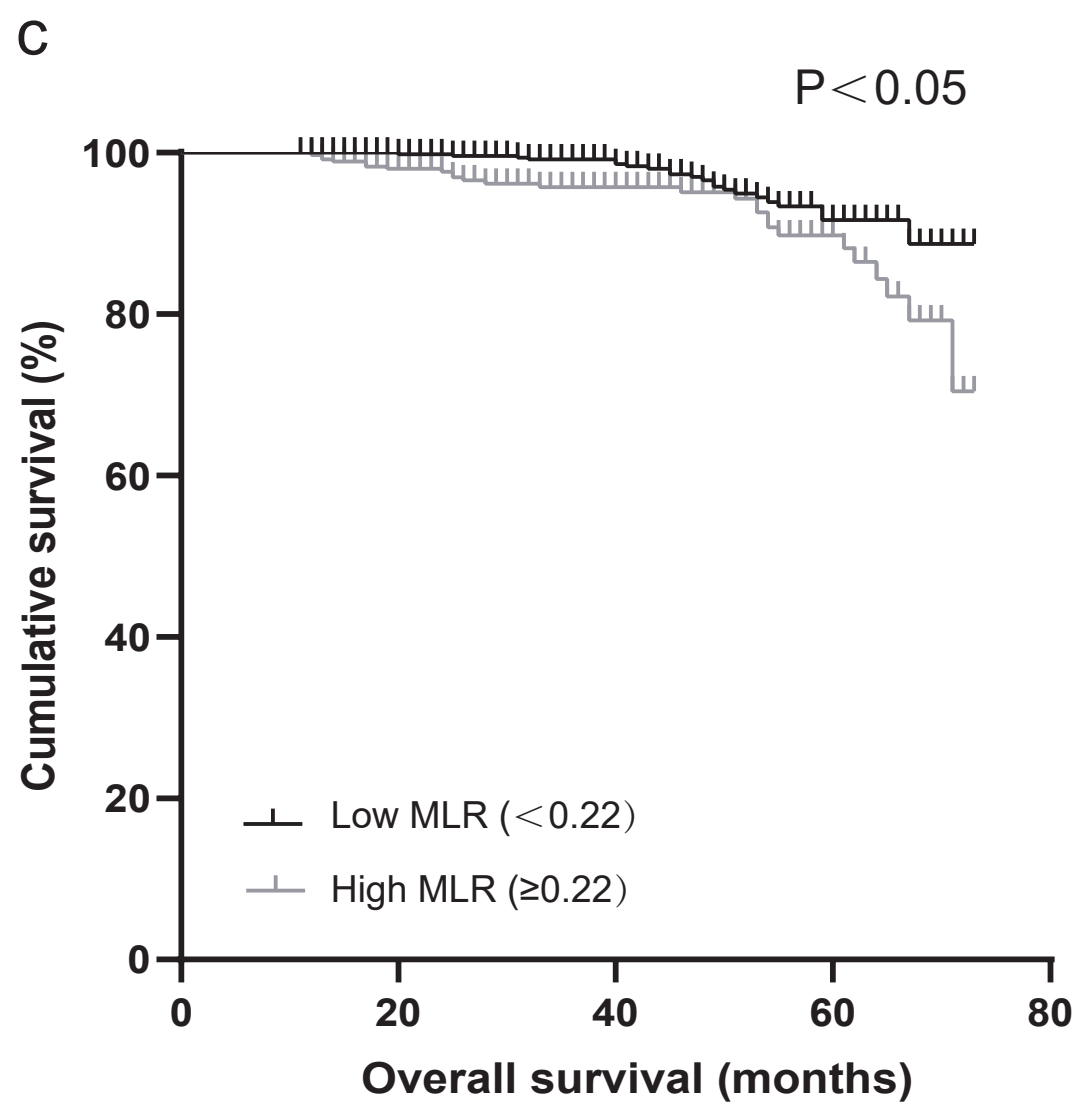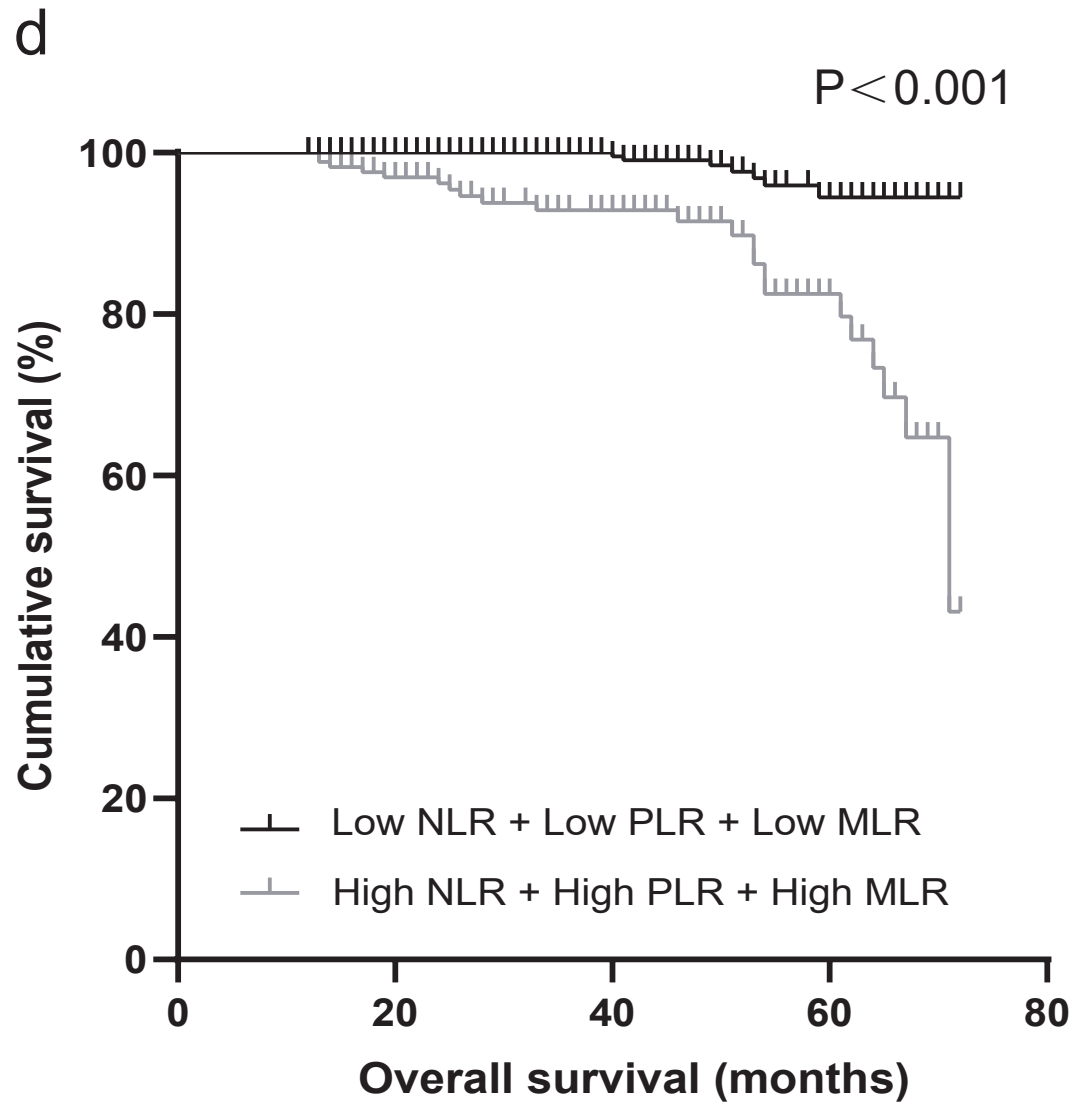

Supplement: MOESM3 [file 18009026]
